# Supplementary material for: Development of an environmentally friendly formulation of silk fibroin associated with fatty acid from Astrocaryum murumuru Mart. fat, effective against larvae of the Aedes aegypti vector
Source: Research Square preprint supplement (doi:10.21203/rs.3.rs-570302/v1), 2021-06-11
Supplement: Supplementary file 1 [file 2971f73b11ffb955c0019ed4.docx]

**Table 2.** Droplet size distribution, PDI and Zeta of emulsions prepared with esters and silk fibroin.

| **Fatty acid ester** | **Time (days)** | **Size (nm)** | **PDI** | **Zeta (mV)** |
| --- | --- | --- | --- | --- |
| 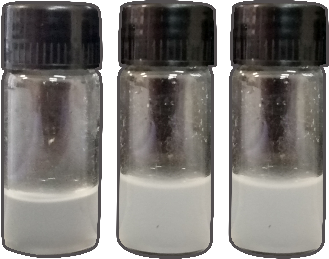  FAEE-SF | 0 | 702.5 (±92.43) | 0.709 (±0.08) | -53.9 (±4.50) |
| 7 | 512.9 (±152.35) | 0.528 (±0.15) | -40.4 (±0.76) |
| 14 | 315.7 (±5.96) | 0.415 (±0.01) | -33.6 (±6.20) |
| 21 | 229.4 (±8.31) | 0.396 (±0.03) | -33.3 (±0.65) |
| 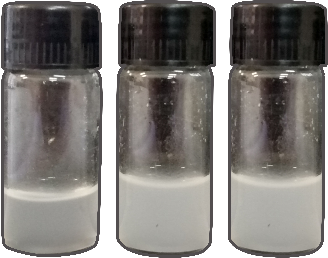  FAPE-SF | 0 | 274.06 (±2.41) | 0.452 (±0.02) | -46.4 (±5.31) |
| 7 | 293.3 (±20.43) | 0.419 (±0.02) | -38.4 (±0.78) |
| 14 | 293.5 (±11.50) | 0.439 (±0.02) | -30.7 (±2.94) |
| 21 | 280.5 (±14.16) | 0.415 (±0.04) | -34.9 (±3.84) |
| 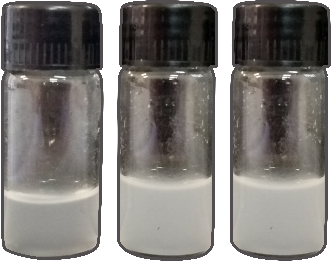  FABE-SF | 0 | 215.5 (±1.57) | 0.320 (±0.03) | -43.6 (±5.42) |
| 7 | 248.9 (±6.25) | 0.419 (±0.02) | -46.0 (±2.21) |
| 14 | 235.3 (±8.73) | 0.366 (±0.02) | -29.5 (±1.85) |
| 21 | 217.5 (±0.85) | 0.338 (±0.01) | -25.6 (±3.24) |
